# Supplementary material for: Novel Pathogenic Variants Leading to Sporadic Amyotrophic Lateral Sclerosis in Greek Patients
Source: MDPI journal article supplement (doi:10.3390/genes15030309), 2024-02-28
Supplement: s1 [file s1]

# Novel pathogenic variants leading to sporadic amyotrophic lateral sclerosis in Greek patients

Ouliana Ivantsik <sup>1</sup>, Anne John <sup>2</sup>, Kyriaki Kydonopoulou <sup>3</sup>, Konstantinos Mitropoulos <sup>4</sup>, Spyridon Gerou <sup>3</sup>, Bassam R. Ali <sup>2,5</sup> and George P. Patrinos <sup>1,2,5,6,7,\*</sup>

<sup>1</sup>Laboratory of Pharmacogenomics and Individualized Therapy, Division of Pharmacology and Biosciences, Department of Pharmacy, School of Health Sciences, University of Patras, 26504 Rion, Greece.

<sup>2</sup>Department of Genetics and Genomics, College of Medicine and Health Sciences, United Arab Emirates University, Al-Ain, P.O. Box 15551, United Arab Emirates

<sup>3</sup>ANALYSI Biomedical Laboratories S.A., 54623 Thessaloniki, Greece

<sup>4</sup>Department of Histology and Embryology, School of Medicine, National and Kapodistrian University of Athens, 10679 Athens, Greece

<sup>5</sup>ASPIRE Abu Dhabi Precision Medicine Research Institute, Al-Ain, P.O. Box 15551, United Arab Emirates

<sup>6</sup>Zayed Center for Health Sciences, United Arab Emirates University, Al-Ain, P.O. Box 15551, United Arab Emirates

<sup>7</sup>Clinical Bioinformatics Unit, Department of Pathology, Faculty of Medicine and Health Sciences, Erasmus University Medical Center, 3000 CA Rotterdam, the Netherlands

**Table S1.** Prediction and scores of variants pathogenicity based on the MutationTaster, PolyPhen-2 and SIFT computational prediction tools.

1

| Gene        | cDNA     | Protein | MutationTaster  |       | PolyPhen-2        |       | SIFT                     |       |
|-------------|----------|---------|-----------------|-------|-------------------|-------|--------------------------|-------|
|             |          |         | Prediction      | Score | Prediction        | Score | Prediction               | Score |
| <i>SOD1</i> | c.248C>G | -       | Disease causing | 1     | -                 | -     | -                        | -     |
| <i>SOD1</i> | c.251T>G | p.C57W  | Disease causing | 1     | Probably damaging | 1     | Affects protein function | 0     |
| <i>SOD1</i> | c.254C>A | -       | Disease causing | 1     | -                 | -     | -                        | -     |
| <i>SOD1</i> | c.292A>T | p.H71L  | Disease causing | 1     | Probably damaging | 0.99  | Affects protein function | 0     |
| <i>SOD1</i> | c.308T>C | -       | Disease causing | 1     | -                 | -     | -                        | -     |
| <i>SOD1</i> | c.349A>C | p.D90A  | Disease causing | 2.09  | Benign            | 0     | Tolerated                | 0.07  |
| <i>FUS</i>  | c.101C>A | p.Q8K   | Disease causing | 0.62  | Benign            | 0.01  | Affects protein function | 0     |
| <i>FUS</i>  | c.162G>T | p.S28I  | Disease causing | 0.97  | Probably damaging | 0.87  | Affects protein function | 0     |
| <i>FUS</i>  | c.184G>C | p.Q35H  | Disease causing | 1     | Probably damaging | 1     | Affects protein function | 0     |
| <i>FUS</i>  | c.221G>T | p.G48C  | Disease causing | 0.99  | Probably damaging | 1     | Affects protein function | 0     |
| <i>FUS</i>  | c.223C>A | -       | Polymorphism    | 5.68  | -                 | -     | -                        | -     |
| <i>FUS</i>  | c.626A>C | p.M183L | Disease causing | 0.74  | Benign            | 0     | Affects protein function | 0     |
| <i>FUS</i>  | c.759G>T | p.G227V | Disease causing | 1     | Benign            | 0.39  | Affects protein function | 0     |
| <i>FUS</i>  | c.760C>G | -       | Disease causing | 1     | -                 | -     | -                        | -     |
| <i>FUS</i>  | c.800A>T | p.R241* | Disease causing | 1     | -                 | -     | -                        | -     |
| <i>FUS</i>  | c.806C>T | p.R243C | Disease causing | 1     | Benign            | 0.02  | Affects protein function | 0     |
| <i>FUS</i>  | c.830G>T | p.G251C | Disease causing | 1     | Probably damaging | 1     | Affects protein function | 0     |

|               |           |         |                 |      |                   |      |                          |      |
|---------------|-----------|---------|-----------------|------|-------------------|------|--------------------------|------|
| <i>FUS</i>    | c.*41G>A  | -       | Disease causing | 1    | -                 | -    | -                        | -    |
| <i>FUS</i>    | c.*81C>T  | -       | Polymorphism    | 1    | -                 | -    | -                        | -    |
| <i>FUS</i>    | c.*306T>C | -       | Polymorphism    | 1    | -                 | -    | -                        | -    |
| <i>FUS</i>    | c.*354A>T | -       | Polymorphism    | 1    | -                 | -    | -                        | -    |
| <i>FUS</i>    | c.*356G>A | -       | Polymorphism    | 1    | -                 | -    | -                        | -    |
| <i>FUS</i>    | c.*362T>G | -       | Polymorphism    | 1    | -                 | -    | -                        | -    |
| <i>FUS</i>    | c.*370A>T | -       | -               | -    | -                 | -    | -                        | -    |
| <i>FUS</i>    | c.*406G>A | -       | -               | -    | -                 | -    | -                        | -    |
| <i>TARDBP</i> | c.5T>C    | -       | Disease causing | 1    | -                 | -    | -                        | -    |
| <i>TARDBP</i> | c.24C>G   | -       | Polymorphism    | 1    | -                 | -    | -                        | -    |
| <i>TARDBP</i> | c.227G>C  | p.R41P  | Disease causing | 1    | Benign            | 0.01 | Affects protein function | 0    |
| <i>TARDBP</i> | c.274G>A  | p.E57K  | Disease causing | 1    | Benign            | 0.02 | Affects protein function | 0    |
| <i>TARDBP</i> | c.295G>A  | p.D64N  | Disease causing | 1    | Possibly damaging | 0.57 | Affects protein function | 0    |
| <i>TARDBP</i> | c.295G>T  | p.D64Y  | Disease causing | 1    | Possibly damaging | 0.9  | Affects protein function | 0    |
| <i>TARDBP</i> | c.300T>C  | -       | Disease causing | 1    | -                 | -    | -                        | -    |
| <i>TARDBP</i> | c.303C>G  | -       | Disease causing | 1    | -                 | -    | -                        | -    |
| <i>TARDBP</i> | c.304T>G  | p.W67G  | Disease causing | 1    | Probably damaging | 1    | Affects protein function | 0    |
| <i>TARDBP</i> | c.363G>A  | -       | Disease causing | 1    | -                 | -    | -                        | -    |
| <i>TARDBP</i> | c.405G>A  | -       | Disease causing | 1    | -                 | -    | -                        | -    |
| <i>TARDBP</i> | c.468G>T  | p.E121D | Polymorphism    | 0.81 | Benign            | 0.01 | Tolerated                | 0.88 |

|        |           |         |                 |   |                   |      |                          |      |
|--------|-----------|---------|-----------------|---|-------------------|------|--------------------------|------|
| TARDBP | c.487G>A  | p.E128K | Disease causing | 1 | Possibly damaging | 0.85 | Tolerated                | 0.27 |
| TARDBP | c.490G>T  | p.V129F | Disease causing | 1 | Possibly damaging | 0.49 | Affects protein function | 0.02 |
| TARDBP | c.500T>G  | p.V132G | Disease causing | 1 | Possibly damaging | 0.94 | Affects protein function | 0    |
| TARDBP | c.594G>C  | p.Q163H | Disease causing | 1 | Probably damaging | 1    | Affects protein function | 0.02 |
| TARDBP | c.674G>A  | p.R190K | Disease causing | 1 | Benign            | 0.11 | Tolerated                | 0.29 |
| TARDBP | c.686T>G  | p.F193L | Disease causing | 1 | Probably damaging | 0.99 | Affects protein function | 0.03 |
| TARDBP | c.703G>A  | p.D200N | Disease causing | 1 | Possibly damaging | 0.77 | Tolerated                | 0.21 |
| TARDBP | c.714G>A  | -       | Disease causing | 1 | -                 | -    | -                        | -    |
| TARDBP | c.715G>A  | p.D204N | Disease causing | 1 | Benign            | 0.17 | Tolerated                | 0.08 |
| TARDBP | c.741G>T  | p.Q212H | Disease causing | 1 | Possibly damaging | 0.87 | Affects protein function | 0.01 |
| TARDBP | c.744C>G  | p.Y214* | Disease causing | 1 | -                 | -    | -                        | -    |
| TARDBP | c.777A>T  | -       | Disease causing | 1 | -                 | -    | -                        | -    |
| TARDBP | c.781A>G  | p.R226G | Disease causing | 1 | Probably damaging | 1    | Affects protein function | 0    |
| TARDBP | c.801A>T  | -       | Disease causing | 1 | -                 | -    | -                        | -    |
| TARDBP | c.972T>A  | -       | Disease causing | 1 | -                 | -    | -                        | -    |
| TARDBP | c.995G>T  | p.G297V | Disease causing | 1 | Benign            | 0.05 | Affects protein function | 0.02 |
| TARDBP | c.1001G>A | p.G299E | Disease causing | 1 | Possibly damaging | 0.95 | Affects protein function | 0.03 |
| TARDBP | c.1134G>A | -       | Disease causing | 1 | -                 | -    | -                        | -    |
| TARDBP | c.1180C>A | p.Q326R | Disease causing | 1 | Possibly damaging | 0.65 | Affects protein function | 0.01 |
| TARDBP | c.1182G>A | -       | Disease causing | 1 | -                 | -    | -                        | -    |

|               |           |         |                 |      |                   |      |                          |   |
|---------------|-----------|---------|-----------------|------|-------------------|------|--------------------------|---|
| <i>TARDBP</i> | c.1322C>T | p.S406F | Disease causing | 1    | Possibly damaging | 0.92 | Affects protein function | 0 |
| <i>TARDBP</i> | c.1326G>T | p.K407N | Disease causing | 1    | Probably damaging | 1    | Affects protein function | 0 |
| <i>TARDBP</i> | c.1328C>T | p.S408F | Disease causing | 1    | Possibly damaging | 0.47 | Affects protein function | 0 |
| <i>TARDBP</i> | c.1347G>A | -       | Disease causing | 1    | -                 | -    | -                        | - |
| <i>TARDBP</i> | c.1350A>G | -       | Polymorphism    | 0.99 | -                 | -    | -                        | - |

**Table S2:** Genetic variants found in each sporadic ALS patient.

| Sample | Gene              | Exon   | Variant   |         |              | Genotype | Type of variant |
|--------|-------------------|--------|-----------|---------|--------------|----------|-----------------|
|        |                   |        | cDNA      | Protein | rsID         |          |                 |
| ALS-1  | No variants found |        |           |         |              |          |                 |
| ALS-2  | FUS               | 6      | c.806C>T  | p.R243C | rs1165095258 | het      | Missense        |
|        | TARDBP            | 5' UTR | c.24C>G   | -       | rs965172966  | het      | -               |
| ALS-6  | TARDBP            | 5' UTR | c.5T>C    | -       | -            | het      | -               |
|        | TARDBP            | 5' UTR | c.24C>G   | -       | rs965172966  | het      | -               |
| ALS-9  | FUS               | 3      | c.223C>A  | -       | -            | het      | Silent          |
|        | TARDBP            | 6      | c.1134G>A | -       | -            | het      | Silent          |
| ALS-10 | FUS               | 6      | c.760C>G  | -       | rs151073460  | het      | Silent          |
|        | FUS               | 6      | c.806C>T  | p.R243C | rs1165095258 | het      | Missense        |
| ALS-12 | SOD1              | 3      | c.248C>G  | -       | -            | het      | Silent          |
|        | SOD1              | 3      | c.251T>G  | p.C57W  | -            | het      | Missense        |
|        | SOD1              | 3      | c.254C>A  | -       | rs549580868  | het      | Silent          |
|        | FUS               | 3      | c.223C>A  | -       | -            | hom      | Silent          |
| ALS-13 | FUS               | 3      | c.223C>A  | -       | -            | hom      | Silent          |
|        | FUS               | 3' UTR | c.*41G>A  | -       | rs80301724   | het      | -               |
|        | TARDBP            | 5' UTR | c.24C>G   | -       | rs965172966  | hom      | -               |
|        | TARDBP            | 6      | c.1134G>A | -       | -            | het      | Silent          |

|        |               |   |           |         |              |     |          |
|--------|---------------|---|-----------|---------|--------------|-----|----------|
| ALS-14 | <i>FUS</i>    | 3 | c.223C>A  | -       | -            | hom | Silent   |
|        | <i>TARDBP</i> | 5 | c.674G>A  | p.R190K | -            | het | Missense |
|        | <i>TARDBP</i> | 5 | c.741G>T  | p.Q212H | -            | het | Missense |
| ALS-21 | <i>FUS</i>    | 3 | c.223C>A  | -       | -            | hom | Silent   |
|        | <i>TARDBP</i> | 6 | c.1322C>T | p.S406F | -            | het | Missense |
| ALS-22 | <i>SOD1</i>   | 3 | c.292A>T  | p.H71L  | -            | het | Missense |
|        | <i>SOD1</i>   | 3 | c.308T>C  | -       | -            | het | Silent   |
|        | <i>FUS</i>    | 6 | c.806C>T  | p.R243C | rs1165095258 | het | Missense |
| ALS-23 | <i>TARDBP</i> | 6 | c.1134G>A | -       | -            | het | Silent   |
| ALS-24 | <i>FUS</i>    | 3 | c.223C>A  | -       | -            | het | Silent   |
| ALS-25 | <i>FUS</i>    | 6 | c.806C>T  | p.R243C | rs1165095258 | het | Missense |
|        | <i>TARDBP</i> | 3 | c.500T>G  | p.V132G | rs766116483  | het | Missense |
|        | <i>TARDBP</i> | 6 | c.1134G>A | -       | -            | het | Silent   |
| ALS-30 | <i>SOD1</i>   | 3 | c.162G>T  | p.S28I  | -            | het | Missense |
|        | <i>FUS</i>    | 3 | c.223C>A  | -       | -            | het | Silent   |
|        | <i>FUS</i>    | 6 | c.626A>C  | p.M183L | rs762914131  | het | Missense |
|        | <i>FUS</i>    | 6 | c.760C>G  | -       | rs151073460  | het | Silent   |
|        | <i>FUS</i>    | 6 | c.806C>T  | p.R243C | rs1165095258 | het | Missense |
|        | <i>TARDBP</i> | 2 | c.274G>A  | p.E57K  | -            | het | Missense |
| ALS-38 | <i>FUS</i>    | 3 | c.223C>A  | -       | -            | hom | Silent   |

|        |               |   |           |         |             |     |          |
|--------|---------------|---|-----------|---------|-------------|-----|----------|
|        | <i>FUS</i>    | 6 | c.626A>C  | p.M183L | rs762914131 | het | Missense |
|        | <i>FUS</i>    | 6 | c.800A>T  | p.R241* | -           | het | Nonsense |
|        | <i>TARDBP</i> | 6 | c.1134G>A | -       | -           | het | Silent   |
| ALS-39 | <i>SOD1</i>   | 4 | c.349A>C  | p.D90A  | -           | hom | Missense |
| ALS-40 | <i>FUS</i>    | 3 | c.223C>A  | -       | -           | het | Silent   |
|        | <i>FUS</i>    | 6 | c.800A>T  | p.R241* | -           | het | Nonsense |
|        | <i>TARDBP</i> | 2 | c.274G>A  | p.E57K  | -           | het | Missense |
| ALS-41 | <i>TARDBP</i> | 2 | c.274G>A  | p.E57K  | -           | het | Missense |
|        | <i>TARDBP</i> | 2 | c.295G>A  | p.D64N  | -           | het | Missense |
|        | <i>TARDBP</i> | 4 | c.594G>C  | p.Q163H | -           | het | Missense |
| ALS-57 | <i>FUS</i>    | 6 | c.626A>C  | p.M183L | rs762914131 | het | Missense |
|        | <i>TARDBP</i> | 2 | c.295G>T  | p.D64Y  | -           | het | Missense |
|        | <i>TARDBP</i> | 2 | c.303C>G  | -       | -           | het | Silent   |
|        | <i>TARDBP</i> | 5 | c.703G>A  | p.D200N | -           | het | Missense |
|        | <i>TARDBP</i> | 5 | c.715G>A  | p.D204N | -           | het | Missense |
|        | <i>TARDBP</i> | 5 | c.744C>G  | p.Y214* | -           | het | Nonsense |
|        | <i>TARDBP</i> | 5 | c.777A>T  | -       | -           | het | Silent   |
|        | <i>TARDBP</i> | 5 | c.781G>A  | p.R226G | -           | het | Missense |
|        | <i>TARDBP</i> | 5 | c.801A>T  | -       | -           | het | Silent   |
| ALS-58 | <i>SOD1</i>   | 2 | c.101C>A  | p.Q8K   | -           | het | Missense |



|        |                   |        |           |         |              |     |          |
|--------|-------------------|--------|-----------|---------|--------------|-----|----------|
|        | <i>TARDBP</i>     | 5      | c.674G>A  | p.R190K | -            | het | Missense |
|        | <i>TARDBP</i>     | 5      | c.686T>G  | p.F193L | -            | het | Missense |
|        | <i>TARDBP</i>     | 5      | c.714G>A  | -       | rs1333943256 | het | Silent   |
|        | <i>TARDBP</i>     | 5      | c.781G>A  | p.R226G | -            | het | Missense |
|        | <i>TARDBP</i>     | 6      | c.1134G>A | -       | -            | het | Silent   |
|        | <i>TARDBP</i>     | 3' UTR | c.1350A>G | -       | -            | het | -        |
| ALS-60 | <i>FUS</i>        | 3' UTR | c.*356G>A | -       | rs886051940  | het | -        |
| ALS-61 | <i>FUS</i>        | 3' UTR | c.*356G>A | -       | rs886051940  | het | -        |
| ALS-62 | No variants found |        |           |         |              |     |          |
| ALS-63 | <i>FUS</i>        | 3' UTR | c.*306T>C | -       | -            | het | -        |
|        | <i>TARDBP</i>     | 2      | c.300T>C  | -       | rs61730366   | het | Silent   |
|        | <i>TARDBP</i>     | 6      | c.995G>T  | p.G297V | rs1643653768 | het | Missense |
| ALS-64 | <i>FUS</i>        | 3' UTR | c.*356G>A | -       | rs886051940  | het | -        |
| ALS-65 | <i>FUS</i>        | 6      | c.830G>T  | p.G251C | -            | het | Missense |
|        | <i>FUS</i>        | 3' UTR | c.*356G>A | -       | rs886051940  | het | -        |
| ALS-66 | <i>FUS</i>        | 3      | c.184G>C  | p.Q35H  | rs772271532  | het | Missense |
|        | <i>FUS</i>        | 3      | c.221G>T  | p.G48C  | -            | het | Missense |
|        | <i>TARDBP</i>     | 2      | c.227G>C  | p.R41P  | -            | het | Missense |
|        | <i>TARDBP</i>     | 2      | c.274G>A  | p.E57K  | -            | het | Missense |
|        | <i>TARDBP</i>     | 2      | c.295G>A  | p.D64N  | -            | het | Missense |

|        |               |        |           |         |             |     |          |
|--------|---------------|--------|-----------|---------|-------------|-----|----------|
|        | <i>TARDBP</i> | 2      | c.304T>G  | p.W67G  | -           | het | Missense |
| ALS-68 | <i>FUS</i>    | 3      | c.223C>A  | -       | -           | het | Silent   |
|        | <i>TARDBP</i> | 2      | c.274G>A  | p.E57K  | -           | het | Missense |
|        | <i>TARDBP</i> | 6      | c.1134G>A | -       | -           | het | Silent   |
|        | <i>TARDBP</i> | 3' UTR | c.1347G>A | -       | -           | het | -        |
| ALS-69 | <i>FUS</i>    | 3' UTR | c.*356G>A | -       | rs886051940 | het | -        |
|        | <i>FUS</i>    | 3' UTR | c.*370A>T | -       | -           | het | -        |
|        | <i>FUS</i>    | 3' UTR | c.*406G>A | -       | -           | het | -        |
|        | <i>TARDBP</i> | 2      | c.274G>A  | p.E57K  | -           | het | Missense |
| ALS-70 | <i>FUS</i>    | 6      | c.759G>T  | p.G227V | -           | het | Missense |
|        | <i>FUS</i>    | 3' UTR | c.*354A>T | -       | -           | het | -        |
|        | <i>TARDBP</i> | 6      | c.972T>A  | -       | -           | het | Silent   |
|        | <i>TARDBP</i> | 6      | c.1001G>A | p.G299E | -           | het | Missense |
|        | <i>TARDBP</i> | 6      | c.1180C>A | p.Q326R | -           | het | Missense |
|        | <i>TARDBP</i> | 6      | c.1182G>A | -       | -           | het | Silent   |
|        | <i>TARDBP</i> | 6      | c.1328C>T | p.K407N | -           | het | Missense |
| ALS-72 | <i>TARDBP</i> | 2      | c.274G>A  | p.E57K  | -           | het | Missense |
| ALS-73 | <i>FUS</i>    | 3' UTR | c.*81C>T  | -       | rs768544815 | het | -        |
|        | <i>FUS</i>    | 3' UTR | c.*362T>G | -       | -           | het | -        |
|        | <i>TARDBP</i> | 2      | c.274G>A  | p.E57K  | -           | het | Missense |

|  |               |   |          |         |   |     |          |
|--|---------------|---|----------|---------|---|-----|----------|
|  | <i>TARDBP</i> | 3 | c.363G>A | -       | - | het | Silent   |
|  | <i>TARDBP</i> | 3 | c.405G>A | -       | - | het | Silent   |
|  | <i>TARDBP</i> | 3 | c.468G>T | p.E121D | - | het | Missense |
|  | <i>TARDBP</i> | 3 | c.487G>A | p.E128K | - | het | Missense |
|  | <i>TARDBP</i> | 3 | c.490G>T | p.V129F | - | het | Missense |

**Table S3.** Genetic variants found in family members that do not suffer from sporadic ALS.

| Sample                      | Gene              | Exon   | Variant   |         |              | Genotype | Type of variant |
|-----------------------------|-------------------|--------|-----------|---------|--------------|----------|-----------------|
|                             |                   |        | cDNA      | protein | rsID         |          |                 |
| ALS-59 (son of ALS-58)      | <i>FUS</i>        | 3      | c.264A>G  | p.N63S  | -            | het      | Missense        |
|                             | <i>TARDBP</i>     | 5      | c.674G>A  | p.R190K | -            | het      | Missense        |
|                             | <i>TARDBP</i>     | 5      | c.714G>A  | -       | rs1333943256 | het      | Silent          |
|                             | <i>TARDBP</i>     | 5      | c.781G>A  | p.R226G | -            | het      | Missense        |
| ALS-67 (daughter of ALS-66) | No variants found |        |           |         |              |          |                 |
| ALS-71 (son of ALS-72)      | <i>FUS</i>        | 3' UTR | c.*356G>A | -       | rs886051940  | het      | -               |
|                             | <i>FUS</i>        | 3' UTR | c.*446G>A | -       | -            | het      | -               |
